# Supplementary material for: Assessing air quality index awareness and use in Mexico City
Source: Springer Nature journal article supplement (doi:10.1186/s12889-018-5418-5), 2018-04-23
Supplement: MOESM1 [file 15713942]

## Additional File 1. Survey Questions (Spanish)

Buenos (as) días / tardes / noches / Mi nombre es \_\_\_\_\_, le hablo de Parametría SA de CV, estamos haciendo una encuesta para conocer su opinión sobre temas ambientales. Quisiera hacerle unas preguntas. Su respuesta es confidencial y los datos serán utilizados con fines estadísticos. No le tomaremos más de 10 minutos. Gracias.

1. ¿Qué edad tiene? (**Suspender si es menor de 18 años**)

2. Género (**Anotar sin preguntar**)

1) Masculino

2) Femenino

3. ¿En qué delegación o municipio vive?

### Distrito Federal

1) Álvaro Obregón

2) Azcapotzalco

3) Benito Juárez

4) Coyoacán

5) Cuajimalpa

6) Cuauhtémoc

7) Gustavo A. Madero

8) Iztacalco

9) Iztapalapa

10) Magdalena Contreras

11) Miguel Hidalgo

12) Milpa Alta

13) Tláhuac

14) Tlalpan

15) Venustiano Carranza

16) Xochimilco

### Estado de México

17) Acolman

18) Atenco

19) Atizapán de Zaragoza

20) Chalco

21) Chicoloapan

22) Chimalhuacán

23) Coacalco

24) Cuautitlán

25) Cuautitlán Izcalli

26) Ecatepec

27) Huixquilucan

28) Ixtapaluca

29) Jaltenco

30) La Paz

31) Melchor Ocampo

32) Naucalpan

33) Nezahualcóyotl

34) Nextlalpan

35) Tecámac

36) Teoloyucán

37) Tepetzotlán

38) Texcoco

39) Tlalnepantla

40) Tonanitla

41) Tultepec

42) Tultitlán

43) Valle de Chalco

4. ¿Hasta qué año estudió usted?

1) Nada / Sin estudios

2) Primaria

3) Secundaria

4) Preparatoria

5) Normal / Carrera Técnica o comercial

6) Universidad

7) Maestría o doctorado

5. ¿Cuál es su principal ocupación?

- |                                 |                           |
|---------------------------------|---------------------------|
| 1) Trabajador en el gobierno    | 7) Empresario             |
| 2) Trabajador en sector privado | 8) Ama de casa            |
| 3) Profesionista independiente  | 9) Desempleado            |
| 4) Trabajador por cuenta propia | 10) Jubilado o pensionado |
| 5) Estudiante                   | 11) Campesino o jornalero |
| 6) Comerciante                  | 12) Otro                  |

6. ¿Qué medio de transportes utiliza para ir a su trabajo o escuela o realizar sus actividades cotidianas? (**Enc: registre todas las opciones que mencione**)

| (...)                 | Si mencionó | No mencionó |
|-----------------------|-------------|-------------|
| a) Auto propio        | 1           | 2           |
| b) Auto de la empresa | 1           | 2           |
| c) Auto del gobierno  | 1           | 2           |
| d) Taxi               | 1           | 2           |
| e) Microbús           | 1           | 2           |
| f) Autobús            | 1           | 2           |
| g) Metro              | 1           | 2           |
| h) Combi              | 1           | 2           |
| i) Metrobús           | 1           | 2           |
| j) Tren ligero        | 1           | 2           |
| k) Tren suburbano     | 1           | 2           |
| l) Trolebús           | 1           | 2           |
| m) Motocicleta        | 1           | 2           |
| n) Bicicleta          | 1           | 2           |
| o) Caminando          | 1           | 2           |
| p) Ninguno            | 1           | 2           |

7. ¿Alguien en su hogar ha sido diagnosticado con asma o algún otro tipo de enfermedad respiratoria?

- 1) Sí
- 2) No

8. El gobierno adquiere de manera sistemática información sobre la calidad del aire, esto puede ayudar a informar al público acerca de la contaminación del medio ambiente.

¿Alguna vez ha escuchado o leído sobre el índice de calidad del aire donde vive?

- 1) Sí **PASE A 9**
- 2) No **PASE A 10**

9. Pensando en los últimos doce meses: ¿Cuántas veces redujo o cambió su nivel de actividad al aire libre debido al índice de calidad del aire o a alertas sobre la calidad del aire? Por ejemplo: evitar ejercicio o evitar una actividad agotadora al aire libre

10. Pensando en los últimos doce meses: ¿Cuántas veces usted o alguien de su familia redujo o cambió su nivel de actividad al aire libre debido a la mala calidad del aire o porque se sintió mal debido al aire que respiraba?

11. ¿Algún médico, enfermero u otro profesional de la salud le ha dicho a usted, u otra persona en su hogar, que redujeran su nivel de actividad física al aire libre cuando la calidad del aire fuera mala?

- 1) Sí
- 2) No

12. Tomando en cuenta que cierta información sobre la calidad del aire podría modificar su comportamiento e influenciar sus actividades cotidianas: ¿Que tipo de información le sería más útil? **(Encuestador: Leer opciones 1 y 2)**

1. Pronósticos de la calidad del aire con un día de anticipación
2. Condiciones de la calidad del aire en tiempo real
3. Los dos **(Espontánea)**
4. Ninguno **(Espontánea)**

13. En una escala del 1 al 10, donde 1 es que no está nada preocupado y 10 que está sumamente preocupado, ¿Cómo calificaría su preocupación por la contaminación en el Área Metropolitana de la Ciudad de México?

|   |   |   |   |   |   |   |   |   |    |
|---|---|---|---|---|---|---|---|---|----|
| 1 | 2 | 3 | 4 | 5 | 6 | 7 | 8 | 9 | 10 |
|---|---|---|---|---|---|---|---|---|----|

14. ¿Durante que periodo del año le preocupa más la contaminación?

1. Durante los meses de Invierno (Diciembre-Febrero)
2. Finales de Primavera (Abril – Junio)
3. Meses de Verano (Junio – Agosto)
4. Meses de Otoño (Septiembre – Noviembre)
5. Me preocupa de manera igual durante todo el año
6. No me preocupa la contaminación

15. ¿Durante que momento del día le preocupa más la contaminación?

1. En la mañana, durante las horas pico
2. A fin de mediodía, hasta las horas pico
3. En la tarde
4. Me preocupa de manera igual durante todo el día
5. No me preocupa a ningún momento del día

16. ¿Le preocupa mas la contaminación durante los días entre semana (Lunes a Viernes) o en fin de semana (Sábado y Domingo)?

- 1) Lunes a viernes
- 2) Fin de semana
- 3) Ambos **(Espontánea)**

17. ¿Qué aspecto de la contaminación le preocupa más?

**(Encuestador: Leer opciones 1 a 4)**

1. Visibilidad reducida
2. La salud personal
3. La salud de mi familia
4. Reducir las actividades al aire libre
5. Otro \_\_\_\_\_
6. Ningún aspecto de la contaminación le preocupa
